# Supplementary material for: Electrochemical Biosensor Based on Optimized Biocomposite for Organophosphorus and Carbamates Pesticides Detection
Source: Hindawi journal article supplement (doi:10.1155/2018/7093606), 2018-01-01
Supplement: f1 [file 7093606.f1.zip]

Archive with 3 entries (2 files):
- Supplementary Materials/
- Supplementary Materials/7093606_SupplDesc.docx
- Supplementary Materials/supplementary information 7093606_revised_JNM_2159720.pdf
