# Supplementary material for: Electrochemical Biosensor Based on Optimized Biocomposite for Organophosphorus and Carbamates Pesticides Detection
Source: Hindawi journal article supplement (doi:10.1155/2018/7093606), 2018-01-01
Supplement: f1 [file 7093606.f1.zip › Supplementary Materials/7093606_SupplDesc.docx]

Supplementary information associated with this article can be found in the attached file. These data include the influence of the enzyme loading on the electrochemical parameters, lineal voltammetry measurements and the electroanalytical evaluation with acetylthiocholine.

Table S1. Comparison of the electrochemical parameters obtained by electrochemical impedance spectroscopy (RΩ, Rct and Cdl) for the biocomposites with 16% and 17% of graphite loading and 0.12% of AChE and 0.24% of AChE.

Figure S1. Linear sweep voltammetry response to acetylthiocholine from 0 to 10 mM in phosphate buffer solution ( PBS 0.1 M and pH = 7.0). Scan rate 10 mV/s.

Table S2. The calibration parameters for 20%, 17% and 16% of graphite biocomposite electrode with 0.12% of AChE using amperometric measurements with acetylthiocholine (ATCh) as analyte and PBS 0.1 M at pH = 7.0 as background electrolyte (an = 3, 95% confidence level).

Figure S2. Linear response for biosensors with (A) 16% and 17% of graphite and (B) 20% of graphite loading. Measurements were carried out in 0.1 M phosphate solution at pH = 7.0 and 0.1 M KCl. EAPP = 700 mV.
